# Supplementary material
Source: PubMed Central journal article supplement (PMC3362691)
Supplement: NIHMS366887-supplement-1.pdf [file NIHMS366887-supplement-1.pdf]

## **Supplementary Information**

### **Differential Transcriptional Programming of Class-Specific B Cell Memory by T-bet and ROR $\alpha$**

Nathaniel S. Wang, Louise J. McHeyzer-Williams, Shinji L. Okitsu, Thomas P. Burris, Steven L. Reiner  
& Michael G. McHeyzer-Williams

**Supplementary Figures 1-6**  
**Supplementary Table (Primer list)**  
**Supplementary Methods**

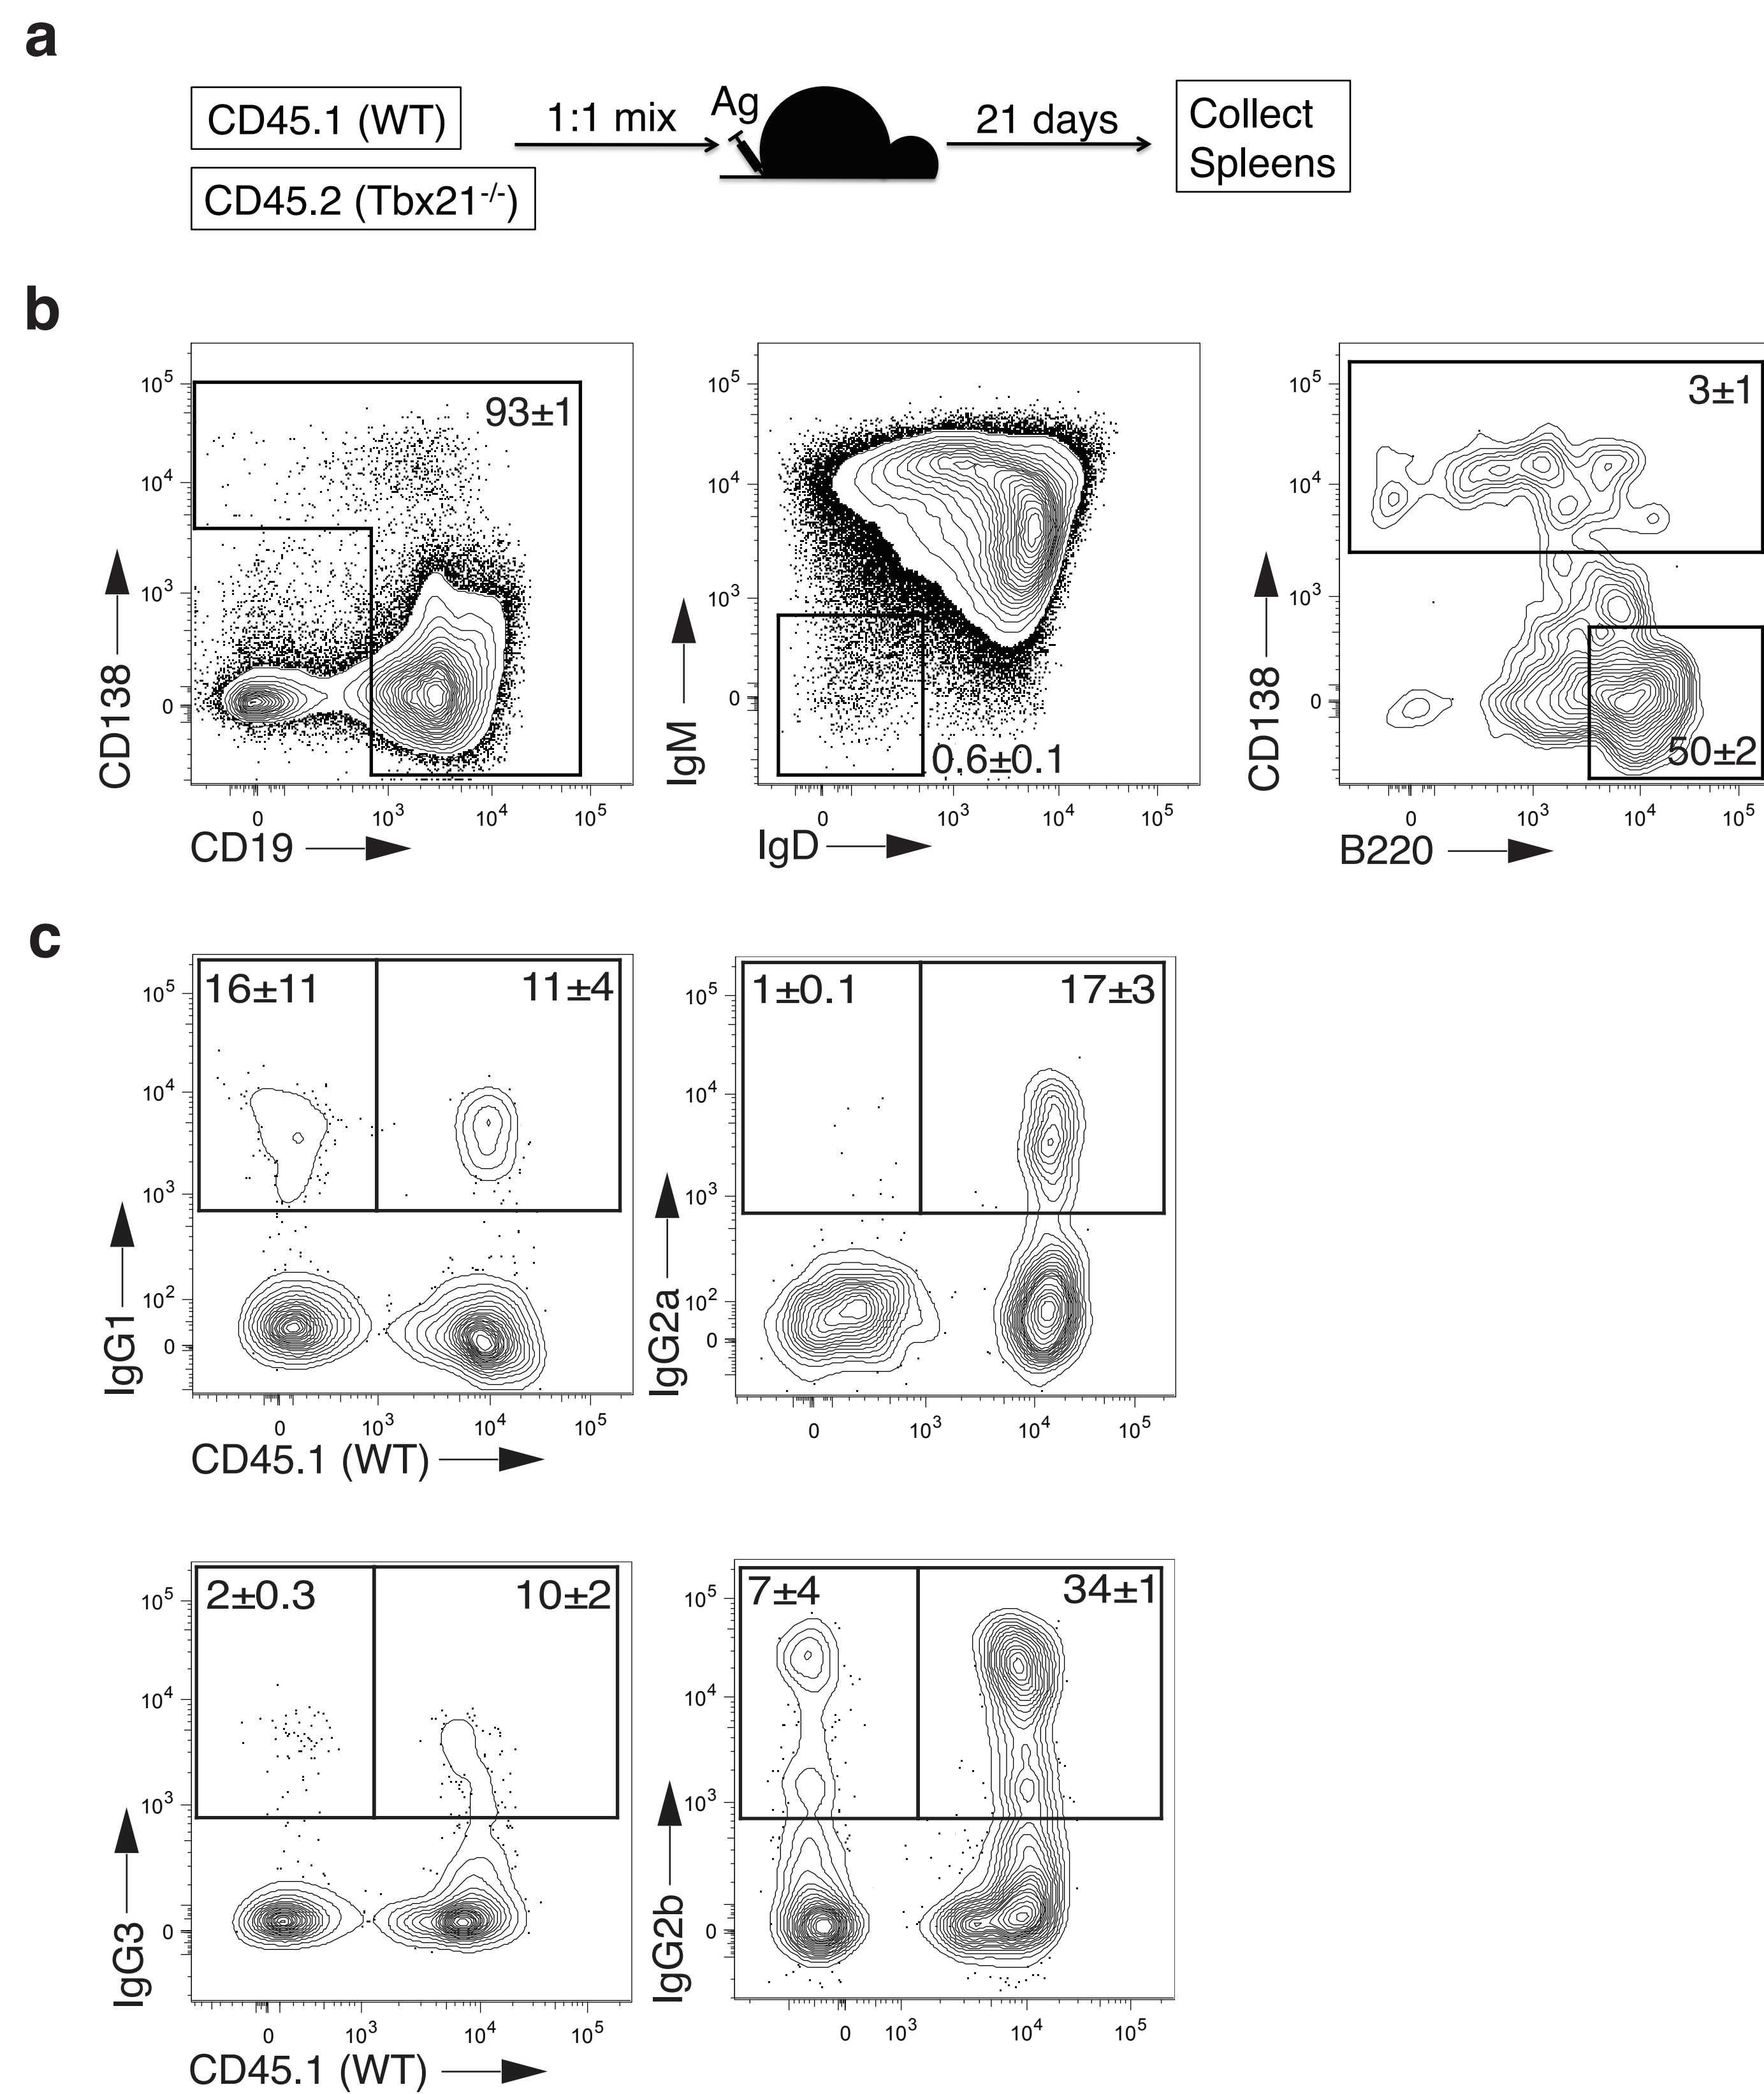

**Supplementary Figure 1. Intact germline knockout pre-transfer**

(a) Schematic for generation of peripheral chimeras using Tbx21<sup>-/-</sup> (CD45.2) and wt (CD45.1) donors.

(b) Gating strategy showing B cell gate (CD19<sup>+</sup> or CD138<sup>+</sup>) already gated on Gr1<sup>-</sup>CD4<sup>-</sup>CD8<sup>-</sup>; Switch gate (IgM<sup>+</sup>IgD<sup>-</sup>) and B220<sup>hi</sup> or Plasma cell (CD138<sup>+</sup>) gate.

(c) Rag1<sup>-/-</sup> mice received 1:1 mixture of splenocytes from Tbx21<sup>-/-</sup> (CD45.2) and wt (CD45.1) donors. Representative expression of isotype staining pre-transfer. Frequency of isotypes is mean±sem of same congenic compartment, n=5, and on B cells (Gr1<sup>-</sup>CD4<sup>-</sup>CD8<sup>-</sup>CD138<sup>+</sup>CD19<sup>+</sup>B220<sup>hi</sup>) that are switched (IgM<sup>+</sup>IgD<sup>-</sup>).

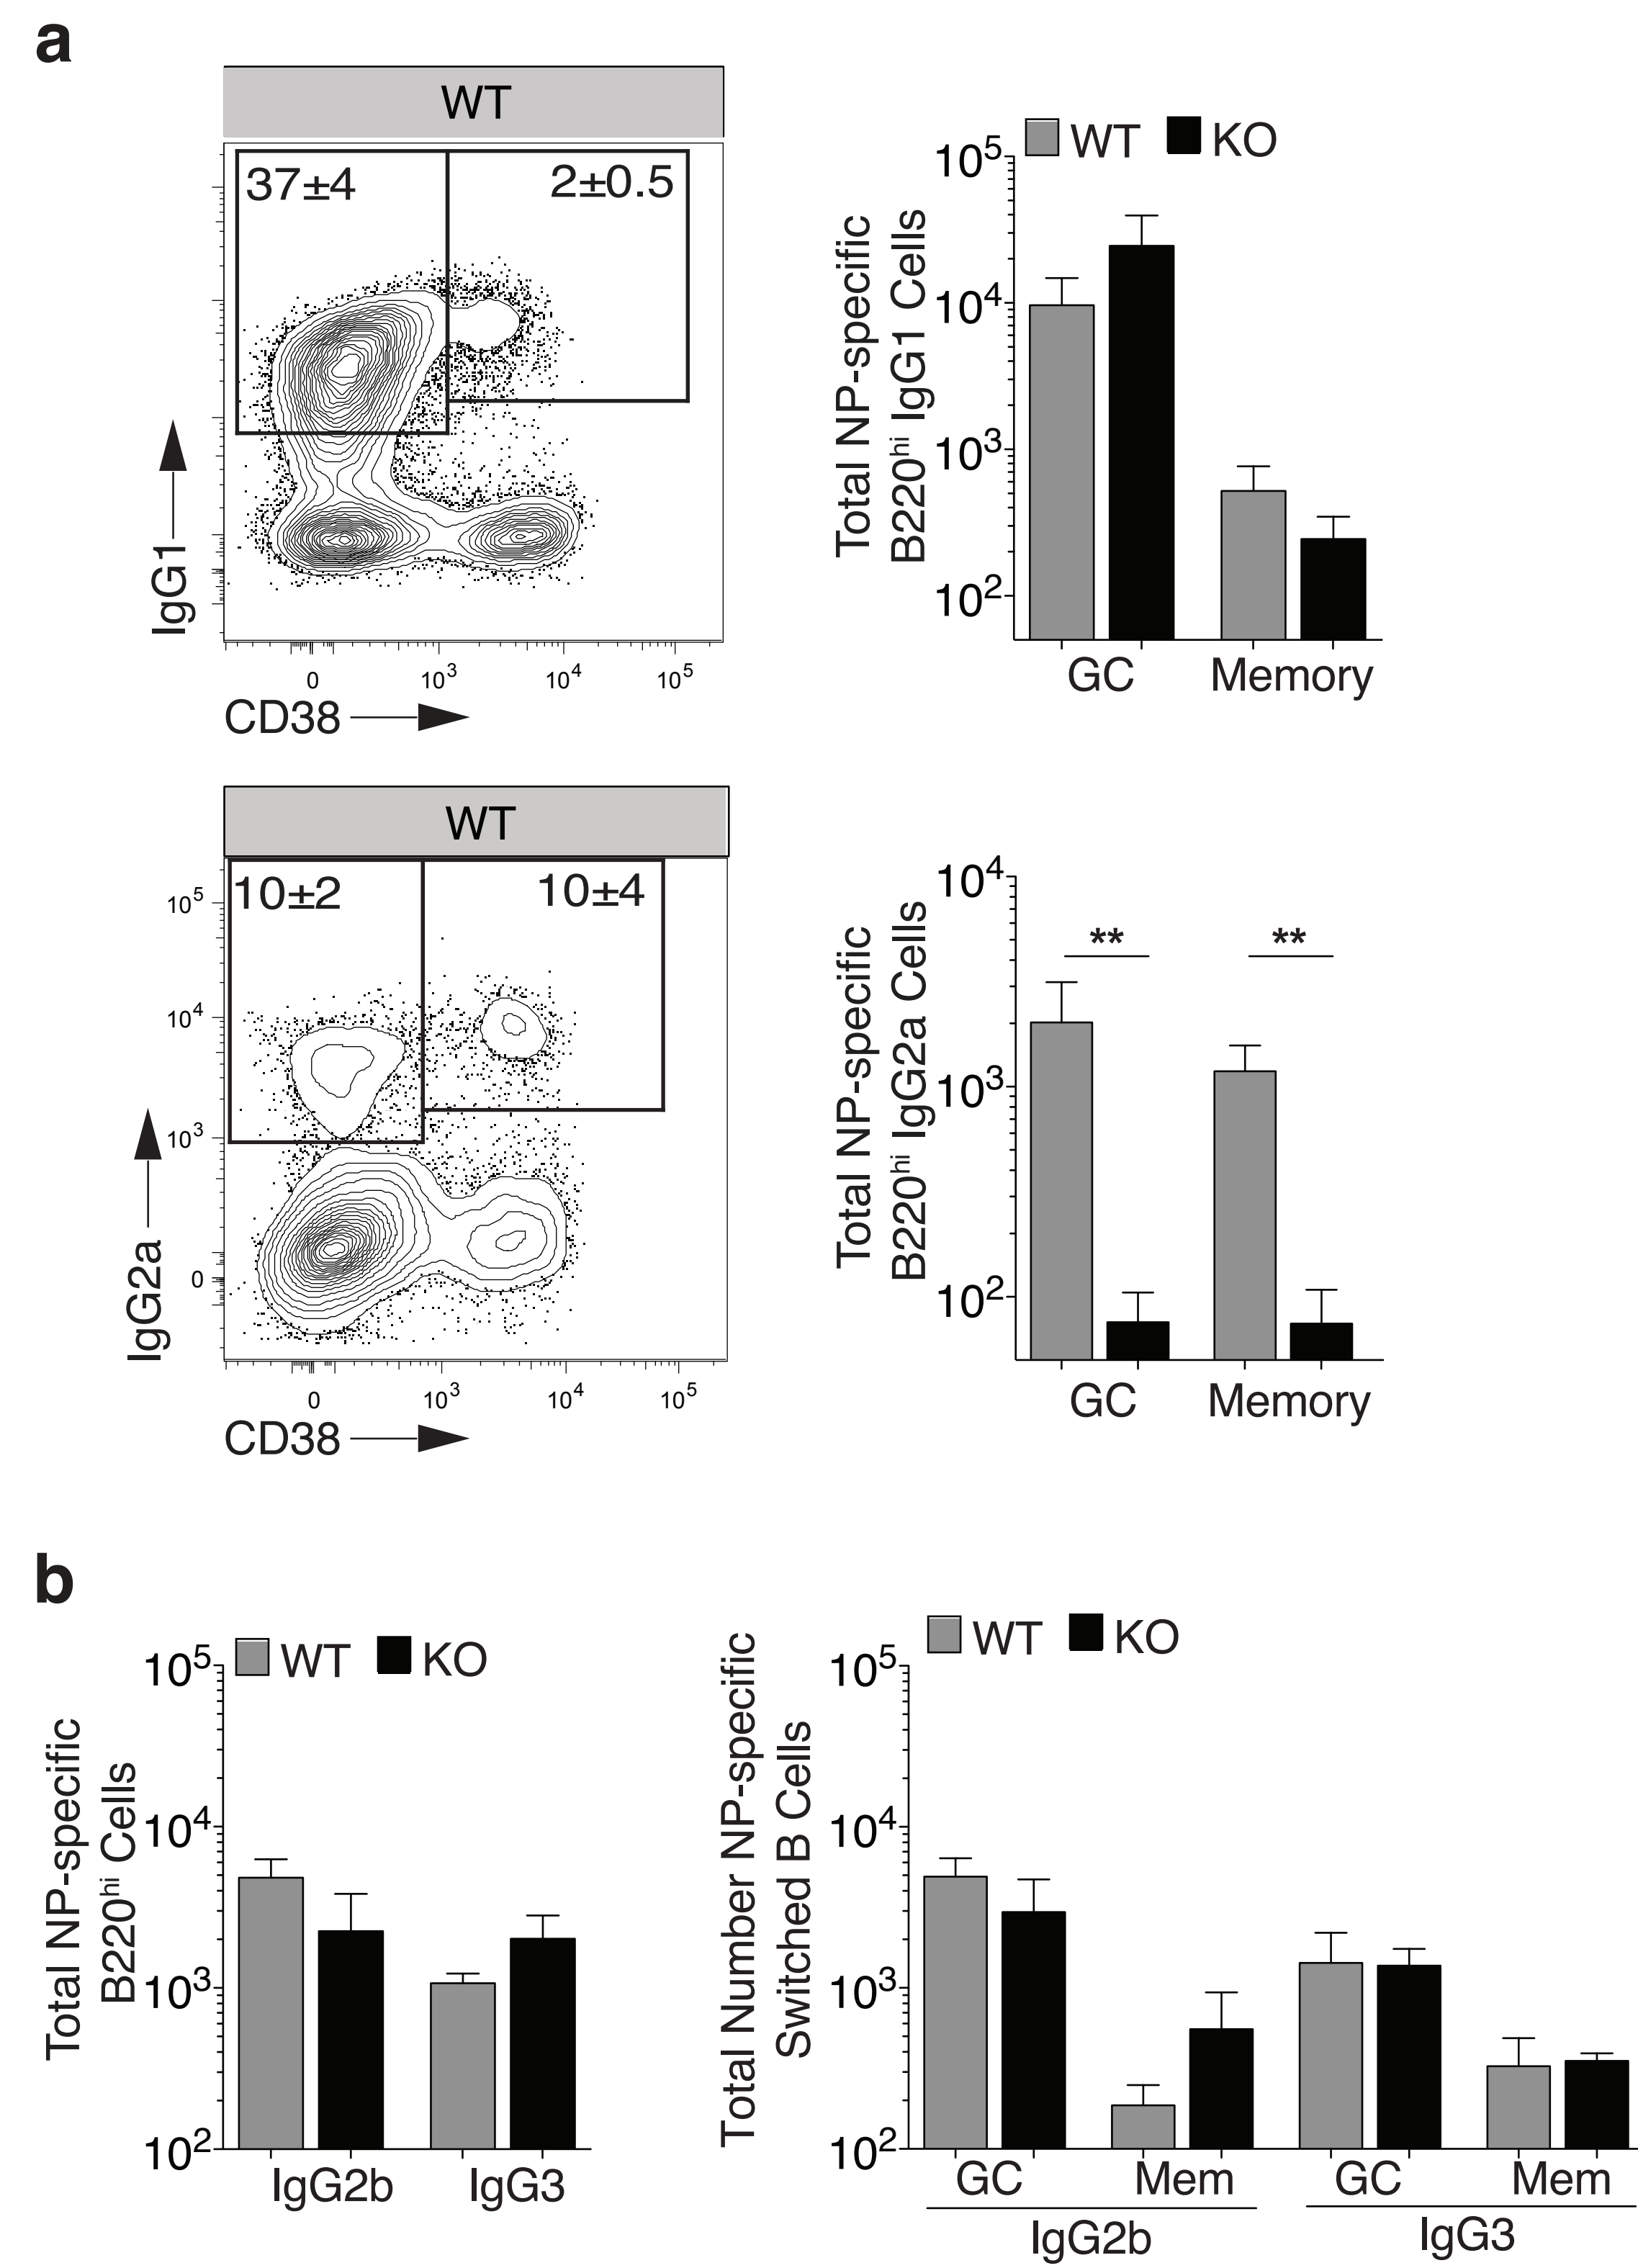

**Supplementary Figure 2. NP-specific response in peripheral chimeras**

**(a)** Splenic NP-specific response in Rag1<sup>-/-</sup> mice 21 days after receiving 1:1 mixture of splenocytes from CD45.1 (WT) and Tbx21<sup>-/-</sup> donors following by an immunization of NP-KLH in adjuvant. Frequency and total cell number of NP-specific switched B cells (Gr1<sup>-</sup>CD4<sup>-</sup>CD8<sup>-</sup> CD19<sup>+</sup> or CD138<sup>+</sup> IgM<sup>-</sup>IgD<sup>-</sup> NP<sup>+</sup>) . n=5 Rag1<sup>-/-</sup> mice. \*\* P value<0.01 (Mann-Whitney Test).

**(b)** Total switched NP-specific B220<sup>hi</sup> B cells that are IgG2b<sup>+</sup> or IgG3<sup>+</sup> from same experiment as in part (a). Frequency represent percentage of same congenic compartment.

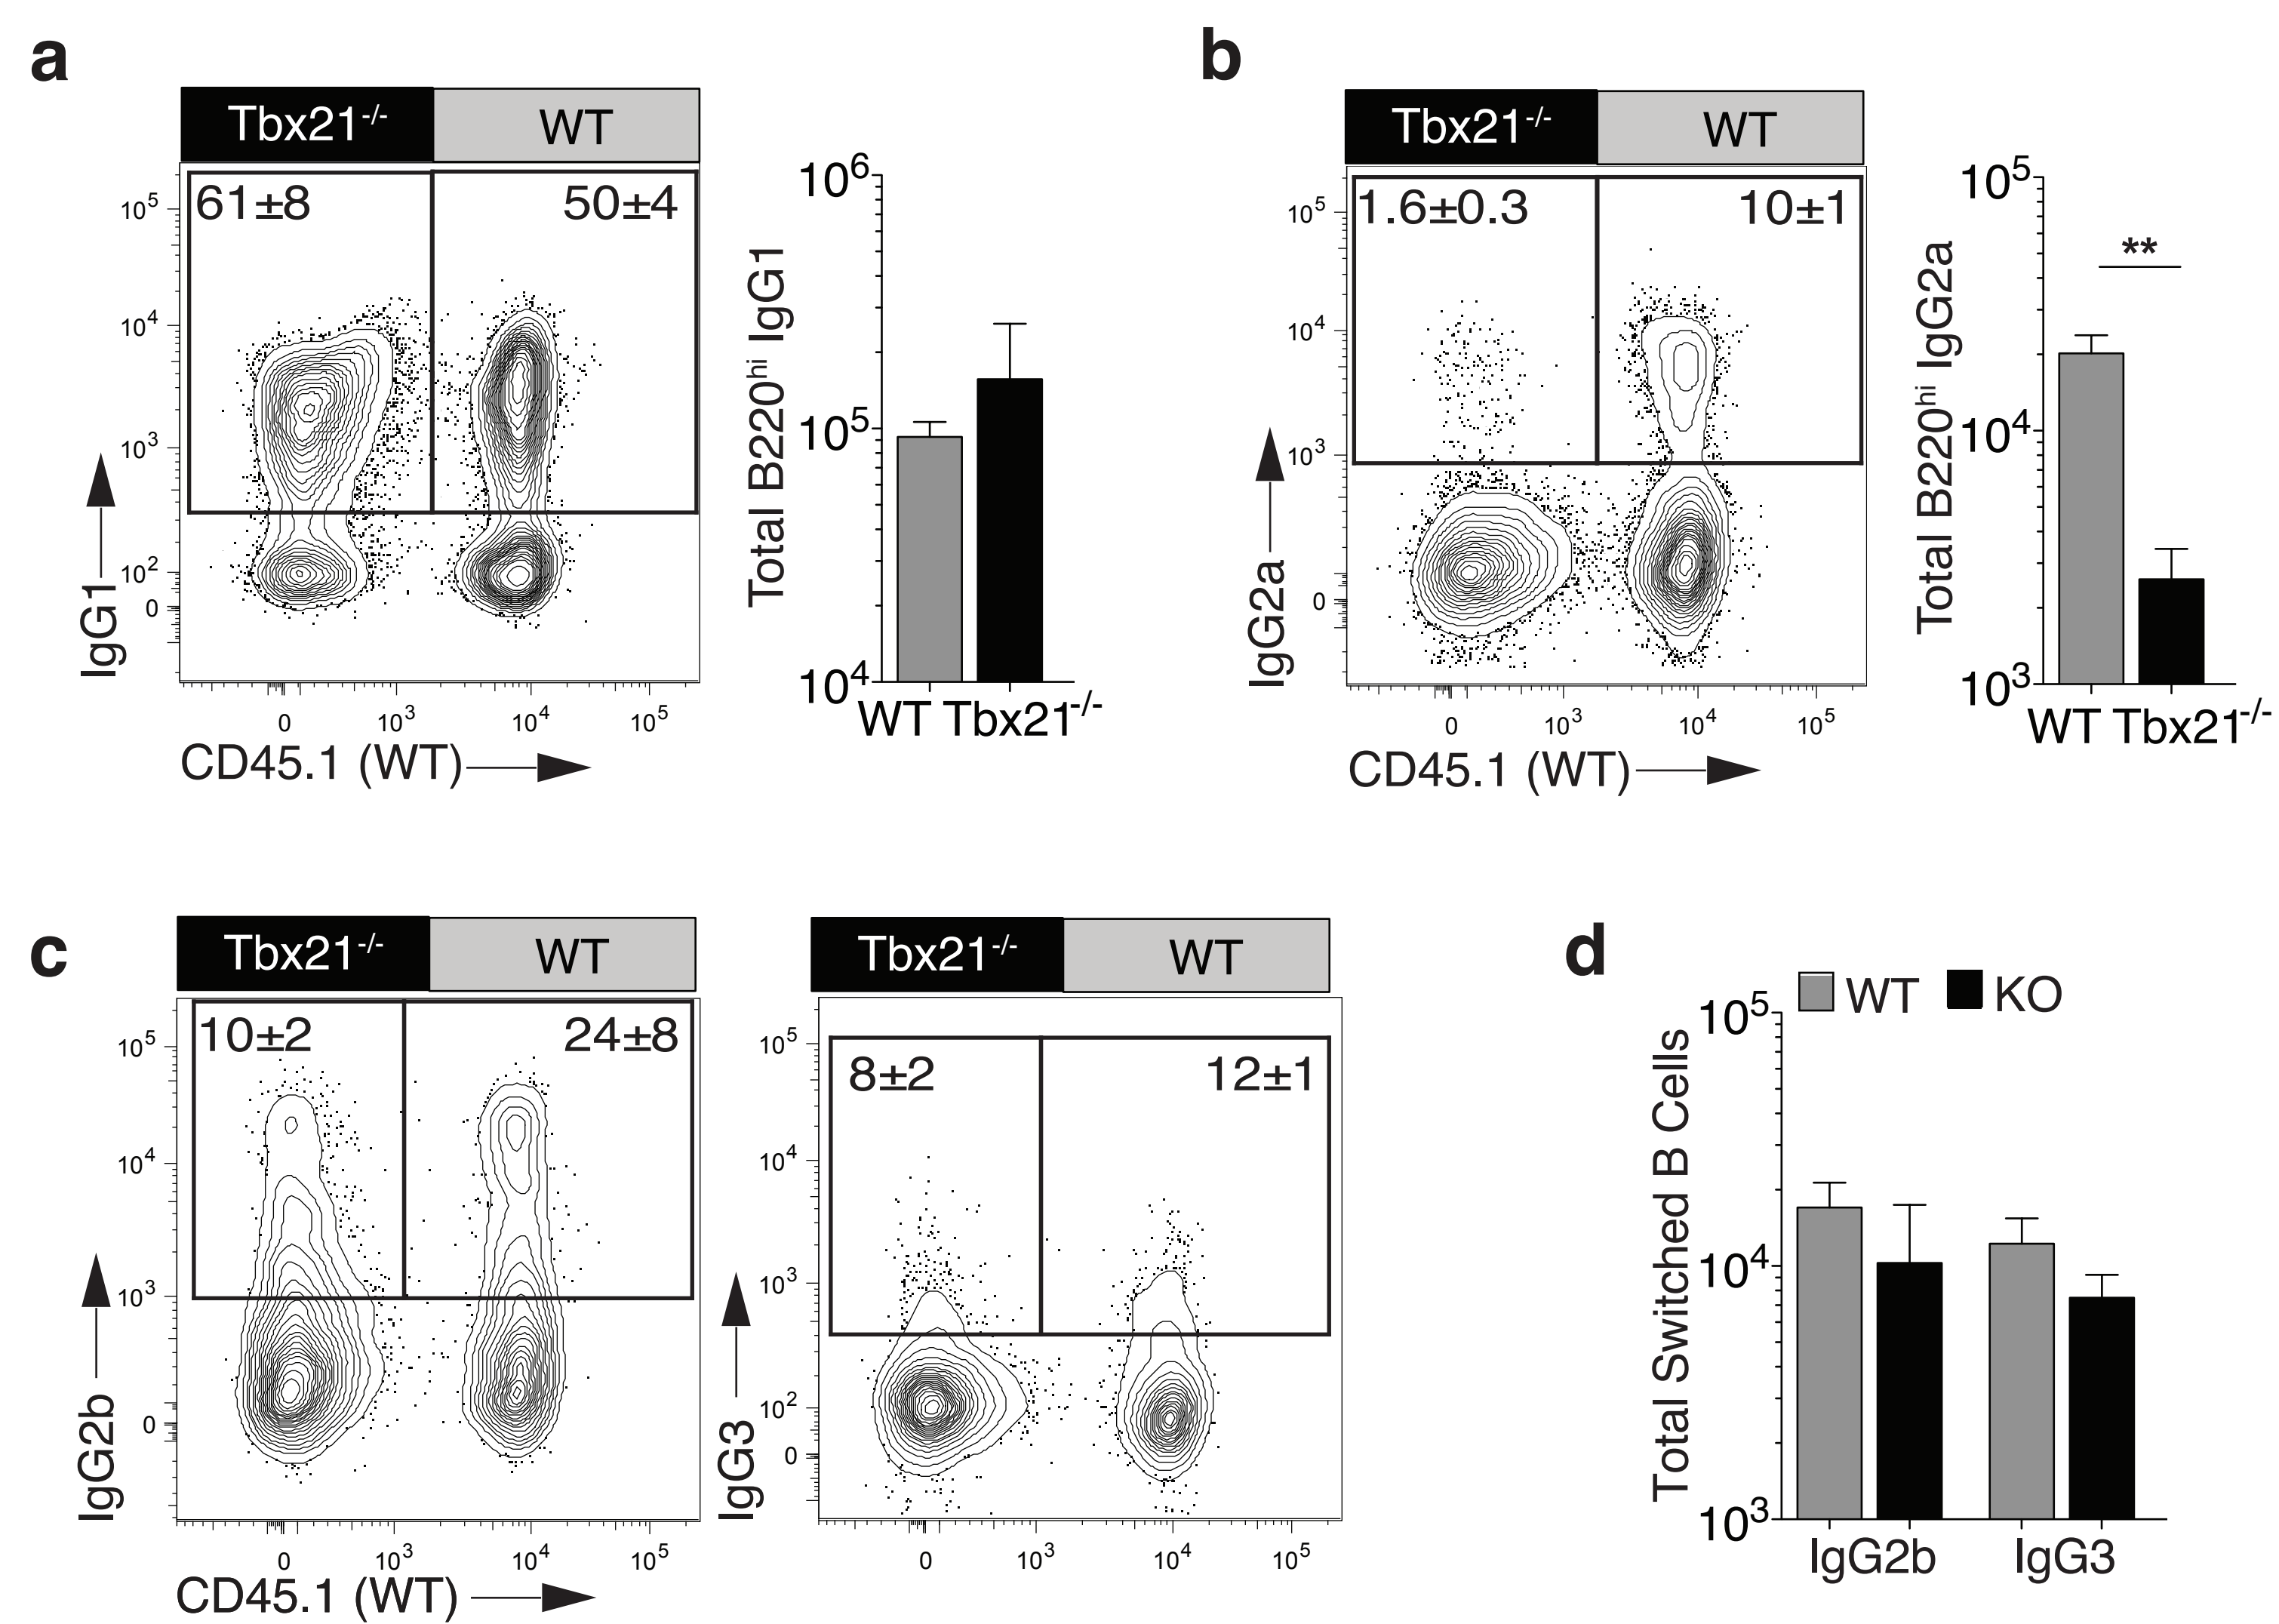

### Supplementary Figure 3. Polyclonal B cell response in peripheral chimera

- (a) Rag1<sup>-/-</sup> mice received 1:1 mixture of splenocytes from Tbx21<sup>-/-</sup> (CD45.2) and wt (CD45.1) donors. Representative IgG1 expression 21 days after immunization in polyclonal B cell (Gr1-CD4-CD8-CD138-CD19+B220<sup>hi</sup>) switched (IgM-IgD-) compartment (left). Mean±sem; n=5 Rag1<sup>-/-</sup> mice.
- (b) Representative frequency IgG2a expression 21 days after immunization in polyclonal switched B cell compartment (left) and total numbers (right). Isotype frequencies are displayed as percentage of same congenic compartment. Mean±sem; n=5 Rag1<sup>-/-</sup> mice. \*\* P value<0.01 (Mann Whitney Test).
- (c) Representative frequency of isotype expression 21 days after immunization in polyclonal switched B cell compartments. Mean±sem; n=5 Rag1<sup>-/-</sup> mice.
- (d) Total numbers from (c). Mean±sem; n=5 Rag1<sup>-/-</sup> mice.

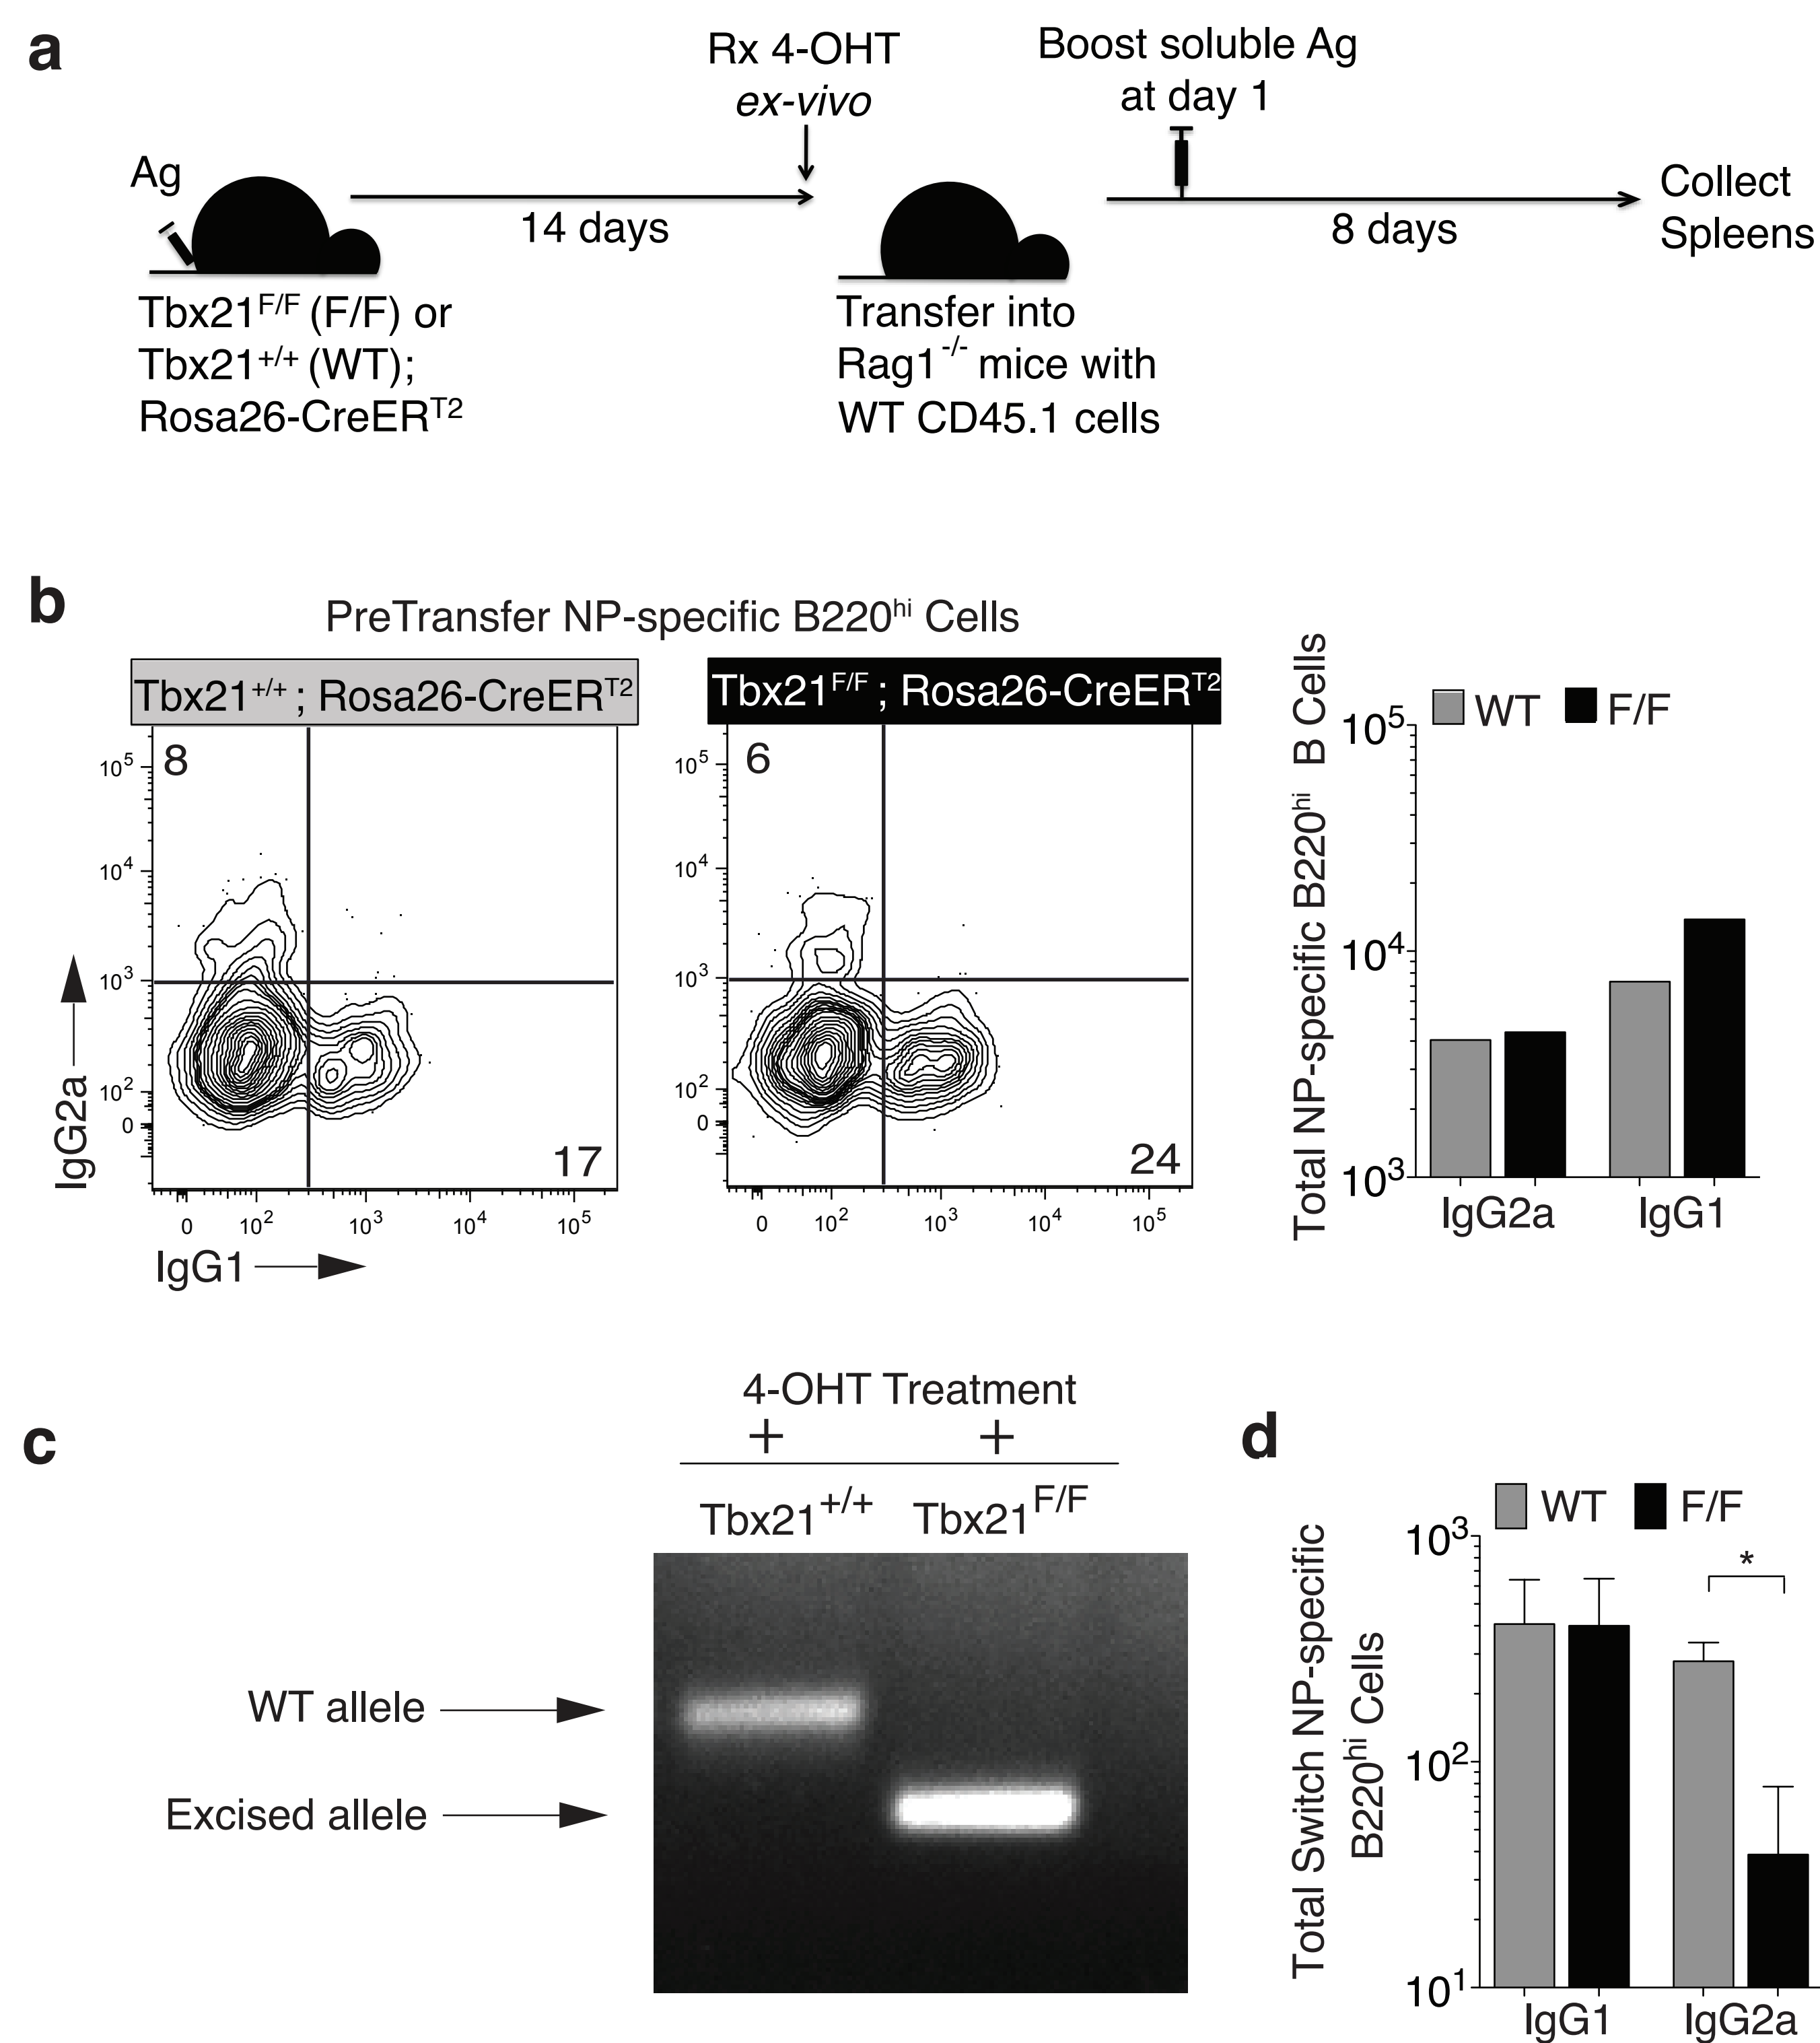

#### Supplementary Figure 4. Generation and analysis of T-bet conditional peripheral chimeras

(a) Schematic depicting generation of peripheral chimera.

(b) Rag1<sup>-/-</sup> mice received 1:1 mixture of splenocytes from Tbx21<sup>F/F</sup>;Rosa26-CreERT<sup>2</sup> or Tbx21<sup>+/+</sup>;Rosa26-CreERT<sup>2</sup> (CD45.2) or wt (CD45.1) donors that were immunized with NP-KLH 14 days prior, as depicted in (a). Splenocytes from these animals were treated ex-vivo with 4OHT, before transfer into Rag1<sup>-/-</sup> recipients. Representative gating strategy to identify and enumerate the input of switched (IgM-IgD-) (left) NP-specific (right) B cells (Gr1-CD4-CD8-CD19+) prior to transfer.

(c) 1x10<sup>6</sup> splenocytes that were treated with 4-OHT from (b) were set aside in ex vivo culture for 24 hours. PCR on genomic DNA from cells to assess Tbx21 excision following drug treatment.

(d) Setup similar to that depicted in (a), except immunized donors were left for 6 months prior to splenocyte transfer into Rag1<sup>-/-</sup> recipients. Rag1<sup>-/-</sup> mice received 1:1 mixture of splenocytes from Tbx21<sup>F/F</sup>;Rosa26-CreERT<sup>2</sup> (CD45.2) or wt (CD45.1) donors that were immunized with NP-KLH 6 months prior. Total isotype-specific B220<sup>hi</sup> switched B cells obtained by gating as in (b) and derived from Tbx21<sup>F/F</sup>;Rosa26-CreERT<sup>2</sup> (F/F) or CD45.1 (wt) donors. Mean±sem; n=3 Rag1<sup>-/-</sup> mice,

\* P value<0.05 (Mann Whitney Test).

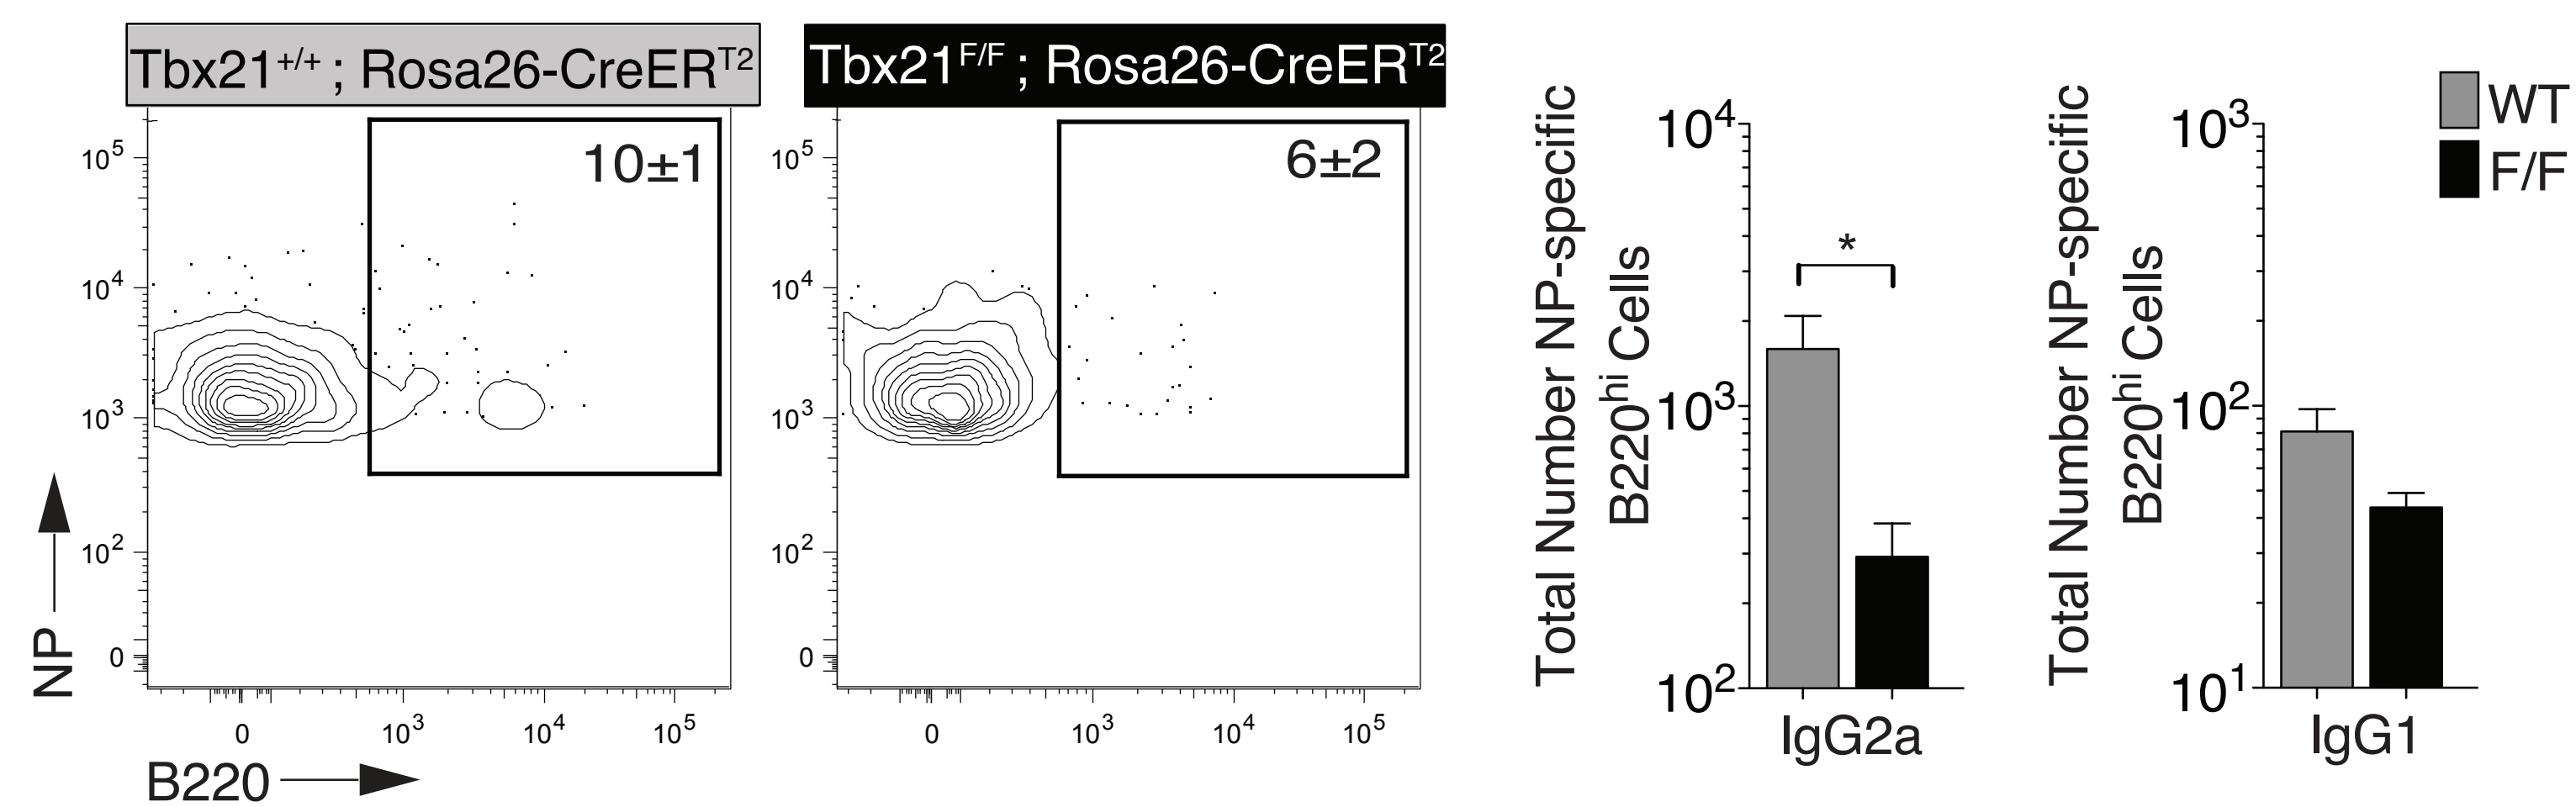

**Supplementary Figure 5. Analysis of T-bet conditional peripheral chimeras following plasma cell and naive B cell depletion**

Tbx21<sup>F/F</sup>;Rosa26-CreERT2 or Tbx21<sup>+/+</sup>;Rosa26-CreER<sup>T2</sup> (CD45.2) donors were immunized with NP-KLH and rested for >8 weeks. Splenocytes were treated ex-vivo with 4-OHT or vehicle, and then FACS-purified to deplete splenocytes of plasma cells (CD138-) and naive B cells (IgM-IgD-). Splenocytes were then transferred into Rag1<sup>-/-</sup> recipients, and boosted with soluble NP-KLH 1 day after transfer. Frequency (left panels) and total number (right panels) of NP-specific isotype-specific cells (Gr1-CD4-CD8- IgM-IgD- CD19+CD138- NP+IgG2a+) in the spleen 4 days after IP boost. Mean±sem, n=3 Rag1<sup>-/-</sup> mice, \*P<0.05.

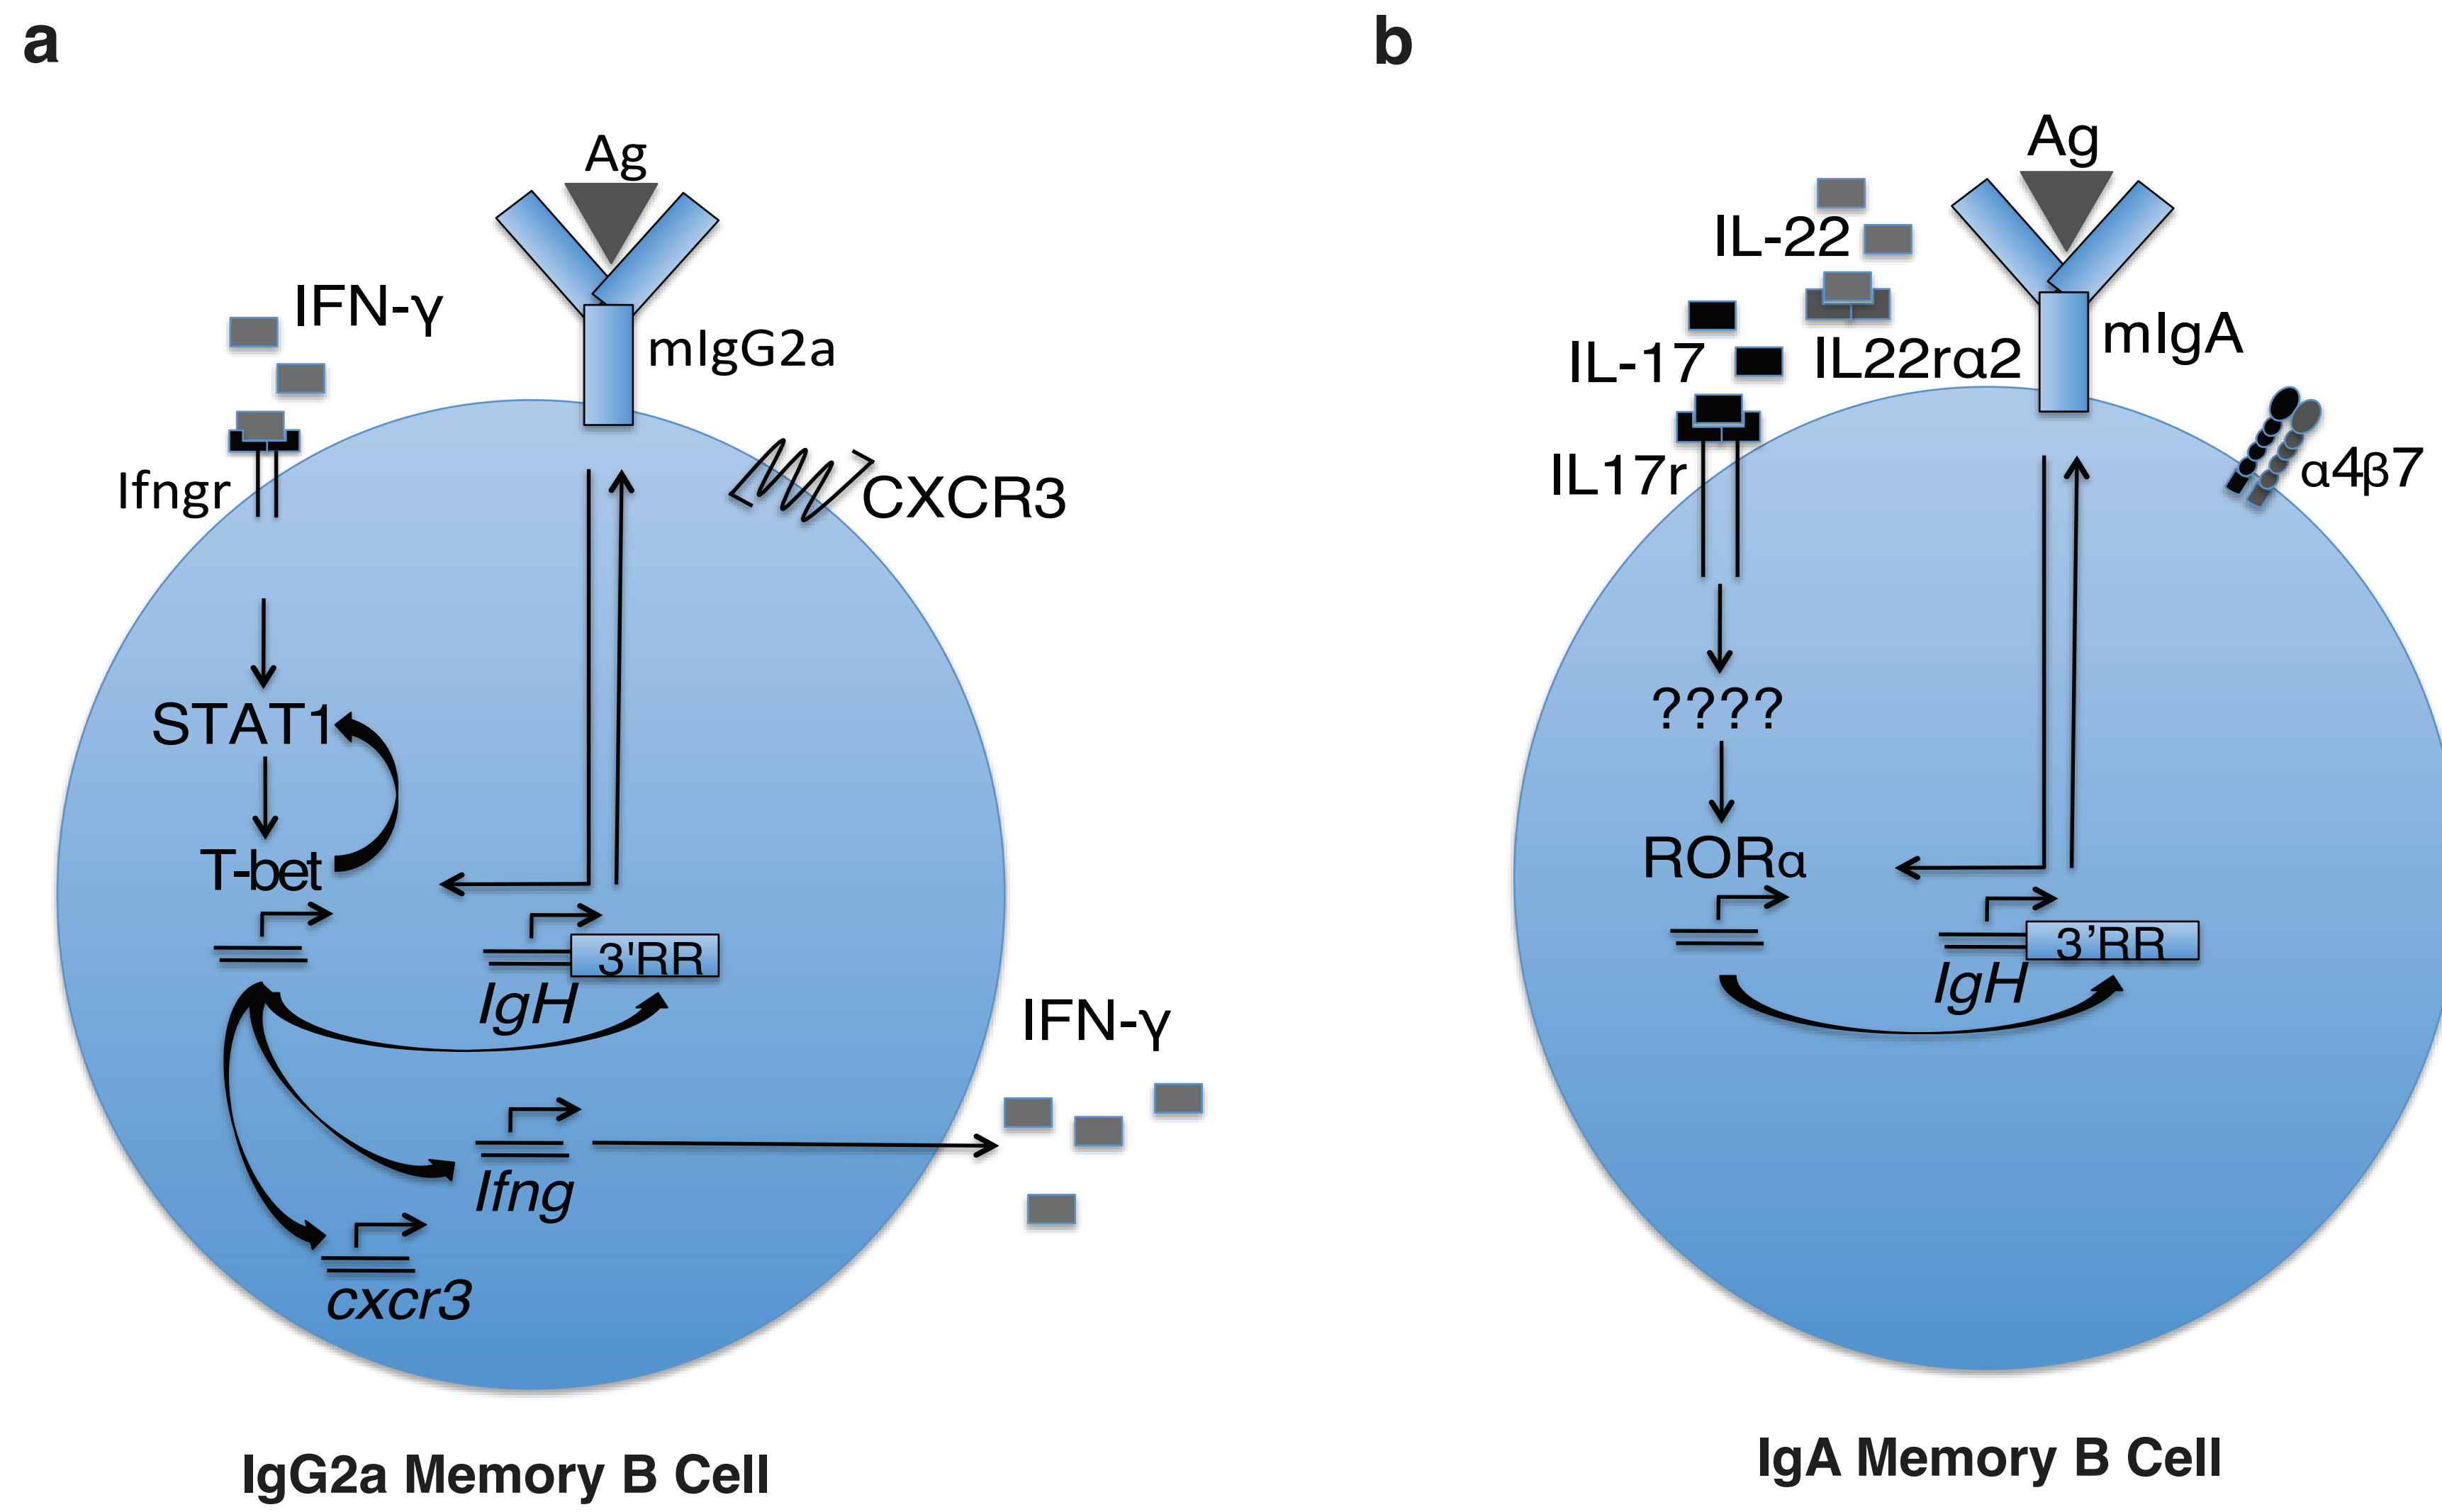

**Supplementary Figure 6. Model of class-specific transcriptional programming of memory B cells.**

**(a)** Schematic depicting model of unique IgG2a memory B cell transcriptional programming.

**(b)** Schematic depicting model of unique IgA memory B cell transcriptional programming.

**Supplementary Table 1. Primers Sets**

| Name                | Sense      | 5' to 3'                |
|---------------------|------------|-------------------------|
| T-bet               | Sense      | TTTCCAAGAGACCCAGTTCATTG |
| T-bet               | Anti-sense | ATGCGTACATGGACTCAAAGTT  |
| GAPDH               | Sense      | AGGTCGGTGTGAACGGATTTG   |
| GAPDH               | Anti-sense | TGTAGACCATGTAGTTGAGGTCA |
| Post-switch Forward | Sense      | GACCTCTCCGAAACCAGGC     |
| Post-switch IgG2a   | Anti-sense | GGGCCAGTGGATAGACCGA     |
| Post-switch IgG1    | Anti-sense | GGATCCAGAGTTCCAGGTCACT  |
| Post-switch IgA     | Anti-sense | GAGCTGGTGGGAGTGTCAAGTG  |
| Stat1               | Sense      | TCACAGTGGTTCGAGCTTCAG   |
| Stat1               | Anti-sense | GCAAACGAGACATCATAGGCA   |
| Rad51               | Sense      | AAGTTTTGGTCCACAGCCTAT   |
| Rad51               | Anti-sense | CGGTGCATAAGCAACAGCC     |
| cxcr3               | Sense      | TACCTTGAGGTTAGTGAACGT   |
| cxcr3               | Anti-sense | CGCTCTCGTTTTCCCATAAT    |
| Ifng                | Sense      | ATGAACGCTACACACTGCATC   |
| Ifng                | Anti-sense | CCATCCTTTTGCCAGTTCCTC   |
| Il2rb               | Sense      | TGGAGCCTGTCCCTCTACG     |
| Il2rb               | Anti-sense | TCCACATGCAAGAGACATTGG   |
| KSR                 | Sense      | GCACCAAGTGCTCAGTGTCTA   |
| KSR                 | Anti-sense | CTGAAGCGTGGGTAGCTGTT    |
| MAPK1               | Sense      | CAGGTGTTGACGTAGGGC      |
| MAPK1               | Anti-sense | TCTGGTGCTCAAAGGACTGA    |
| CDK6                | Sense      | GGCGTACCCACAGAAACCATA   |
| CDK6                | Anti-sense | AGGTAAGGGCCATCTGAAAAC   |
| Runx1               | Sense      | GCAGGCAACGATGAAAACACTAC |
| Runx1               | Anti-sense | GCAACTTGTGGCGGATTTGTA   |
| CALM2               | Sense      | AGCTTCGCCATGTGATGACAA   |
| CALM2               | Anti-sense | TCTTCGTAGTTTACCTGACCG   |
| JMJD1a              | Sense      | CAGCAACTCCATCTAGCAAGG   |
| JMJD1a              | Anti-sense | TGTTCTCGGTACTTCAGGTTTT  |
| CCL3                | Sense      | TTCTCTGTACCATGACACTCT   |
| CCL3                | Anti-sense | CGTGGAATCTTCGGCTGTAG    |
| Psgl1               | Sense      | CCCGGTGAAGCAATGTCTG     |
| Psgl1               | Anti-sense | AGTAGTCCGCACTGGGTACA    |
| Tbet Outer          | Sense      | CAATGTGACCCAGATGATCG    |
| Tbet Outer          | Anti-sense | GTTGACAGTTGGGTCCAGGT    |
| GAPDH Outer         | Sense      | CCGCATCTTCTTGTGCAGT     |
| GAPDH Outer         | Anti-sense | CACCCCATTTGATGTTAGTGG   |
| IFNg Outer          | Sense      | CTGATCCTTTGGACCCTCTG    |
| IFNg Outer          | Anti-sense | GCTGATGGCCTGATTGTCTT    |
| FoxP3               | Sense      | CCCATCCCCAGGAGTCTTG     |
| FoxP3               | Anti-sense | ACCATGACTAGGGGCACTGTA   |
| Rorgt               | Sense      | TTCACCCACCTCCACT        |
| Rorgt               | Anti-sense | TTGTCCCCACAGATCTTGC     |
| Rora                | Sense      | CGCATTGATGGATTTATGGAG   |
| Rora                | Anti-sense | TCGCATACTTCCCGTCAAAG    |
| Gata3               | Sense      | CTCGGCCATTTCGTACATGGAA  |



| Name     | Sense      | 5' to 3'               |
|----------|------------|------------------------|
| Gata3    | Anti-sense | GGATACCTCTGCACCGTAGC   |
| Tgfbri   | Sense      | TCTGCATTGCACTTATGCTGA  |
| Tgfbri   | Anti-sense | AAAGGGCGATCTAGTGATGGA  |
| TgfbriI  | Sense      | AATAGGACCATCCATCCACTG  |
| TgfbriI  | Anti-sense | TCACATCGCAAACTTGCACA   |
| IfngrI   | Sense      | TGACTATGCACGGTCAAAGA   |
| IfngrI   | Anti-sense | CGACCTTTCCCTTTAGGCACA  |
| IfngrII  | Sense      | CTTCCAGCAATGACCCAAGAC  |
| IfngrII  | Anti-sense | TCCAGCAACCTATGCCAAGAG  |
| IL17rc   | Sense      | GCTGCCTGATGGTGACAATGT  |
| IL17rc   | Anti-sense | TGGACGCAGGTACAGTAAGAAG |
| ILL22ra2 | Sense      | AAGCATTGCCTTCTAGGTCTC  |
| ILL22ra2 | Anti-sense | ACGAGCTGGTTGTATTTCTGT  |
| STAT4    | Sense      | GCAGCCAACATGCCTATCCA   |
| STAT4    | Anti-sense | GCAGACACTTTTGTGTTCCACA |
| SMAD2    | Sense      | AAGCCATCACCCTCAGAATT   |
| SMAD2    | Anti-sense | CACTGATCTACCGTATTTGCT  |
| SMAD3    | Sense      | CACGCAGAACGTGAACACC    |
| SMAD3    | Anti-sense | GGCAGTAGATAACGTGAGGGA  |
| SMAD4    | Sense      | AGCCGTCCTTACCCACTGAA   |
| SMAD4    | Anti-sense | GGTGGTAGTGCTGTTATGATG  |
| DAXX     | Sense      | TGCACTGTTCTTAAAGCTCAC  |
| DAXX     | Anti-sense | GGCTCTGTGGGAGGGTTAG    |
| BCL6     | Sense      | CCGGCACGCTAGTGATGTT    |
| BCL6     | Anti-sense | TGTCTTATGGGCTCTAACTGCT |
| PRDM1    | Sense      | TTCTCTTGAAAAACGTGTGGG  |
| PRDM1    | Anti-sense | GGAGCCGGAGCTAGACTTG    |
| Itpr1    | Sense      | ATTTGTTCTCTGTATGCGGAGG |
| Itpr1    | Anti-sense | AGCTTAAAGAGGCAGTCTCTGA |
| Hif1a    | Sense      | GGGGAGGACGATGAACATCAA  |
| Hif1a    | Anti-sense | GGGTGGTTTCTTGTACCCACA  |

## **Supplementary Methods.**

### **Flow Cytometry**

Draining lymph nodes and spleen were removed from unimmunized or immunized animals and single cell suspensions in PBS with 5% (vol/vol) FBS prepared.  $4 \times 10^8$  cells per mL were incubated for 15 min with anti-CD16/32 (Fc block, 2.4G2) followed for 45 min at 4°C with fluorophore-labeled or biotin-labeled monoclonal antibodies: allophycocyanin-conjugated anti-CD138 (281-2), allophycocyanin-Cy7-conjugated anti-CD19 (1D3), phycoerythrin-conjugated anti-CD138 (281-2), phycoerythrin texas red-conjugated anti-B220 (RA3-6B2), fluorescein isothiocyanate-conjugated anti-IgG1 (A85-1), anti-IgG3 (R40-8L), Horizon V500-conjugated anti-CD8 (53-6.7) and anti-CD4 (Rm4-5), biotin-conjugated anti IgG2a<sup>b</sup> (5.7) [all from BD Biosciences]. Phycoerythrin-conjugated anti-T-bet (eBio4B10), Phycoerythrin-cy7-conjugated anti-CD45.1 (A20), Phycoerythrin-cy7-conjugated anti-CXCR3 (CXCR3-173), fluorescein isothiocyanate-conjugated anti-CD45.2 (104), Biotin-conjugated anti-IgG2b (RMG2b-1), Biotin-conjugated anti-CD45.2 (104), and Biotin-conjugated anti-IgA (RMA-1) [all from Biolegend, Inc]. Alexa Fluor 700-conjugated anti-CD38 (90), phycoerythrin-cy5-conjugated anti-Gr-1 (Ly6G/C, RB68C5) [all from eBiosciences, Inc]. Allophycocyanin-conjugated anti-NP, phycoerythrin-conjugated NP, peridinin-chlorophyll protein-cy5.5-conjugated anti-IgM (331.12), Pacific Blue-conjugated IgD (11.26) [all from MMW Lab]. Immunoglobulin-specific antibodies were added in a separate step for 45 min at 4°C with normal mouse serum (1:50) before other reagents were added. Streptavidin-conjugated Qdot 655 (Invitrogen) were used as a second step visualization reagent. For intracellular staining, cells were fixed, permeabilized, and stained using the protocol in the Foxp3 Staining Buffer Set (eBioscience). Cells were washed and re-suspended in PBS/FBS and analyzed with a FACSAria III with FACSDiva software (BD Biosciences). Data were analyzed with FlowJo software (Tree Star, Inc).

### **Quantitative PCR**

cDNA was prepared as described previously (51). Briefly, 5000 cells were sorted directly into lysis buffer (Qiagen) and mRNA was purified using RNeasy Kit (Qiagen). cDNA was generated using the First-Strand Synthesis System for RT-PCR (Invitrogen) using random hexamers. SYBR Green qPCR was conducted using the Platinum SYBR Green Supermix UDG reaction mix (Invitrogen) on the StepOnePlus Real-time

PCR system and analyzed using the Step One Software (Applied Biosystems). Primers were used at a final concentration of 0.25 $\mu$ M and can be found in Supplementary Table 1. GAPDH was used as an endogenous control. For measurement of T-bet expression levels, naïve B cells were assigned a value of 1, and the relative expression assigned accordingly. For measurement of STAT1 and IgG2a post-switch mRNA levels, cells receiving 4-OHT treatment were assigned a value of 1, and the relative expression assigned accordingly. For cells treated with RORa siRNA or SR1001, cells receiving the drug or siRNA were assigned a value of 1, and the relative expression assigned accordingly. For single cell qPCR on mRNA, single cells were directly sorted into 2x Reaction buffer containing SSIII RT Platinum Taq found in the SuperScript III One-Step RT-PCR System with Platinum Taq DNA Polymerase Kit (Invitrogen) and containing outside primers for IFN $\gamma$ , T-bet, and GAPDH at a final concentration of 0.25 $\mu$ M. 96-well plates were placed in PCR cycler for 15 minutes at 50C, followed by 2 minutes at 95C. 22 cycles of 15 seconds at 95C followed by 4 minutes at 60C were then performed. 1 $\mu$ L of product was used in a standard qPCR reaction described above.

## References

51. Fazilleau N *et al.*, *Nat Immunol.* **10**, 375-84, (2009).
